# Supplementary material for: Robotic-assisted versus laparoscopic radical prostatectomy for prostate cancer: the first separate systematic review and meta-analysis of randomised controlled trials and non-randomised studies
Source: PubMed Central journal article supplement — Int J Surg. 2023 Apr 18;109(5):1350–9. doi: 10.1097/JS9.0000000000000193 (PMC10389430; doi:10.1097/js9.0000000000000193), 2023-04-18
Supplement: js9-109-1350-s002.pdf [file js9-109-1350-s002.pdf]

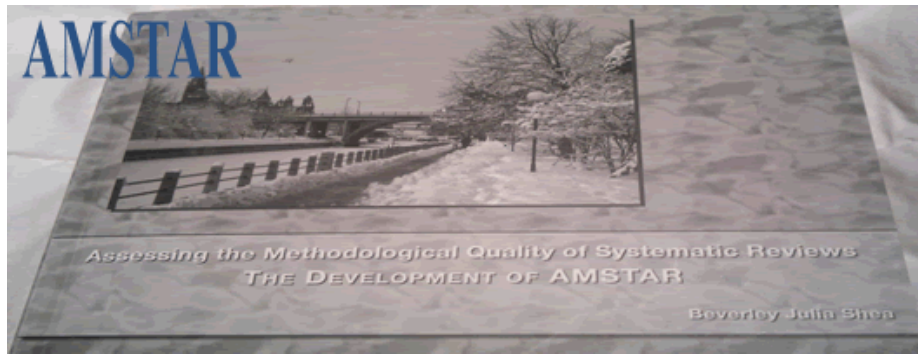

[Home](#) [About Us](#) [Publications](#) [Checklist](#) [FAQs](#) [Contact Us](#)

## AMSTAR 2 Results

[Printer Friendly Version](#)

Article Name:

### Robotic-assisted versus laparoscopic radical prostatectomy for prostate can is a High quality review

|                                                                                                                                                                                                                    |                                                           |
|--------------------------------------------------------------------------------------------------------------------------------------------------------------------------------------------------------------------|-----------------------------------------------------------|
| 1. Did the research questions and inclusion criteria for the review include the components of PICO?                                                                                                                | Yes<br>Yes<br>Yes<br>Yes<br>Yes                           |
| 2. Did the report of the review contain an explicit statement that the review methods were established prior to the conduct of the review and did the report justify any significant deviations from the protocol? | YesYesYesYesYesYesYes                                     |
| 3. Did the review authors explain their selection of the study designs for inclusion in the review?                                                                                                                | Yes<br><br>Yes                                            |
| 4. Did the review authors use a comprehensive literature search strategy?                                                                                                                                          | Partial Yes<br>Yes<br>Yes<br>Yes<br>Yes<br><br>Yes<br>Yes |
| 5. Did the review authors perform study selection in duplicate?                                                                                                                                                    | Yes<br>Yes                                                |
| 6. Did the review authors perform data extraction in duplicate?                                                                                                                                                    | Yes<br>Yes                                                |
| 7. Did the review authors provide a list of excluded studies and justify the exclusions?                                                                                                                           | Yes<br>Yes<br>Yes                                         |
| 8. Did the review authors describe the included studies in adequate detail?                                                                                                                                        | Yes                                                       |

Yes  
Yes  
Yes  
Yes  
Yes

**9. Did the review authors use a satisfactory technique for assessing the risk of bias (RoB) in individual studies that were included in the review?**

RCT

Yes

NRSI

Yes

Yes  
Yes  
Yes  
Yes  
Yes  
Yes  
Yes  
Yes

**10. Did the review authors report on the sources of funding for the studies included in the review?**

Yes

Yes

**11. If meta-analysis was performed did the review authors use appropriate methods for statistical combination of results?**

RCT

Yes

NRSI

Yes

Yes  
Yes  
Yes  
Yes  
Yes  
Yes  
Yes

**12. If meta-analysis was performed, did the review authors assess the potential impact of RoB in individual studies on the results of the meta-analysis or other evidence synthesis?**

Yes

Yes

Yes

**13. Did the review authors account for RoB in individual studies when interpreting/ discussing the results of the review?**

Yes

Yes

**14. Did the review authors provide a satisfactory explanation for, and discussion of, any heterogeneity observed in the results of the review?**

Yes

Yes

**15. If they performed quantitative synthesis did the review authors carry out an adequate investigation of publication bias (small study bias) and discuss its likely impact on the results of the review?**

Yes

Yes

**16. Did the review authors report any potential sources of conflict of interest, including any funding they received for conducting the review?**

Yes

Yes

To cite this tool: Shea BJ, Reeves BC, Wells G, Thuku M, Hamel C, Moran J, Moher D, Tugwell P, Welch V, Kristjansson E, Henry DA. AMSTAR 2: a critical appraisal tool for systematic reviews that include randomised or non-randomised studies of healthcare interventions, or both. *BMJ*. 2017 Sep 21;358:j4008.

[<< Back](#)

Copyright © 2021 AMSTAR All Rights Reserved |
